# Supplementary material for: Association between Self-Reported Global Sleep Status and Prevalence of Hypertension in Chinese Adults: Data from the Kailuan Community
Source: PubMed Central journal article supplement (PMC4306875; doi:10.3390/ijerph120100488), 2015-01-07
Supplement: ijerph-12-00488-s001.pdf [file ijerph-12-00488-s001.pdf]

## Association between Self-Reported Global Sleep Status and Prevalence of Hypertension in Chinese Adults: Data from the Kailuan Community

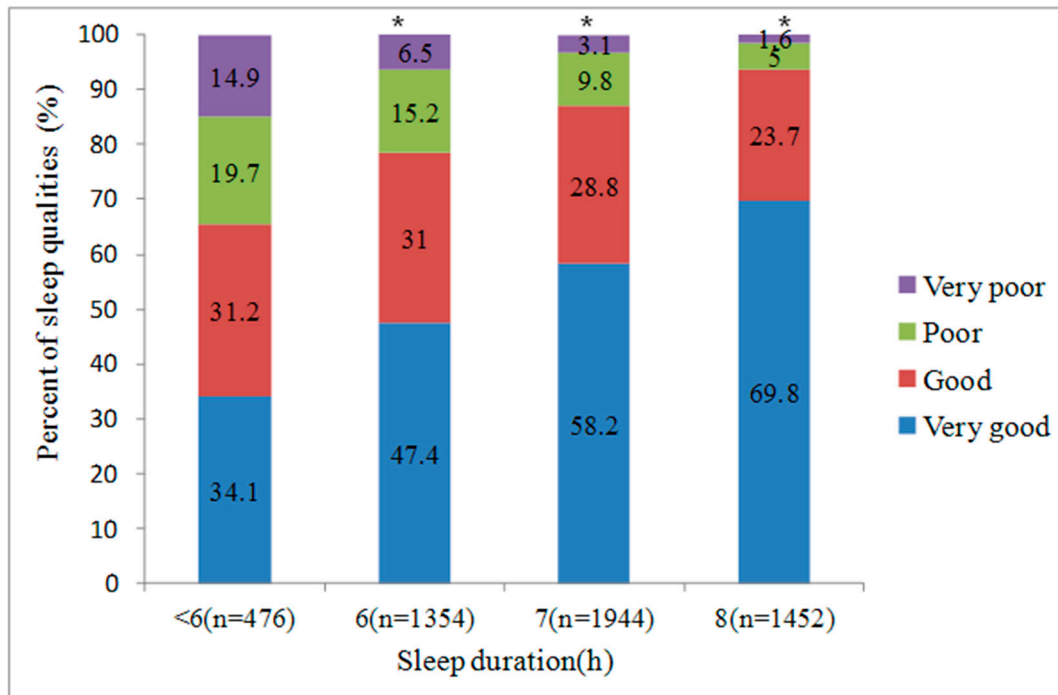

**Figure S1.** The percentages of sleep quality in subjects with sleep duration of 8 h, 7 h, 6 h and less than 6 h in all participants.
